# Supplementary material
Source: PubMed Central journal article supplement (PMC6529204)
Supplement: NIHMS1025812-supplement-Supplementary_Material.pdf [file NIHMS1025812-supplement-Supplementary_Material.pdf]

# Web-based Supplementary Materials for Empirical Bayes Estimation and Prediction Using Summary-Level Information From External Big Data Sources Adjusting for Violations of Transportability

Jason P. Estes, Bhramar Mukherjee, Jeremy M. G. Taylor  
University of Michigan, MI 48109, USA

Table 1: Estimated bias, standard deviation (SD) and mean squared error (MSE) of parameter estimates in linear regression settings I, II, III and IV specified in Table 1 of the main text with full model (13) and reduced model (14) based on 1000 simulation runs. LR denotes the maximum likelihood estimates of (13) fitted to the internal data, EB denotes our empirical Bayes estimator defined in (4) and CML denotes the constrained maximum likelihood estimator proposed in Chatterjee et al. (2016).

| Setting | Method | BIAS            |                 |                 |                 | SD              |                 |                 |                 | MSE             |                 |                 |                 |
|---------|--------|-----------------|-----------------|-----------------|-----------------|-----------------|-----------------|-----------------|-----------------|-----------------|-----------------|-----------------|-----------------|
|         |        | $\hat{\beta}_0$ | $\hat{\beta}_1$ | $\hat{\beta}_2$ | $\hat{\beta}_3$ | $\hat{\beta}_0$ | $\hat{\beta}_1$ | $\hat{\beta}_2$ | $\hat{\beta}_3$ | $\hat{\beta}_0$ | $\hat{\beta}_1$ | $\hat{\beta}_2$ | $\hat{\beta}_3$ |
| I       | LR     | -.001           | -.006           | .008            | -.001           | .205            | .200            | .198            | .187            | .042            | .040            | .039            | .035            |
|         | EB     | -.009           | -.002           | .006            | -.001           | .166            | .167            | .198            | .187            | .028            | .028            | .039            | .035            |
|         | CML    | -.029           | .005            | .012            | .003            | .118            | .137            | .198            | .187            | .015            | .019            | .039            | .035            |
| II      | LR     | .004            | -.019           | .020            | .001            | .202            | .194            | .201            | .190            | .041            | .038            | .041            | .036            |
|         | EB     | .081            | .045            | -.028           | -.042           | .198            | .175            | .204            | .194            | .046            | .033            | .042            | .039            |
|         | CML    | .609            | .106            | .081            | .052            | .128            | .147            | .202            | .190            | .387            | .033            | .047            | .039            |
| III     | LR     | .002            | .000            | .014            | .004            | .280            | .268            | .194            | .161            | .078            | .072            | .038            | .026            |
|         | EB     | -.018           | .069            | .008            | -.006           | .264            | .264            | .194            | .163            | .070            | .075            | .038            | .026            |
|         | CML    | -.106           | .272            | .025            | .020            | .236            | .231            | .195            | .162            | .067            | .127            | .038            | .026            |
| IV      | LR     | .003            | -.004           | -.003           | -.005           | .279            | .263            | .194            | .179            | .078            | .069            | .038            | .032            |
|         | EB     | .017            | .062            | -.037           | -.077           | .277            | .275            | .200            | .207            | .077            | .080            | .041            | .049            |
|         | CML    | .215            | .521            | .041            | .058            | .227            | .232            | .195            | .205            | .098            | .325            | .040            | .045            |

Table 2: Estimated bias, standard deviation (SD) and mean squared error (MSE) of parameter estimates in logistic regression settings I, II, III and IV specified in Table 1 of the main text with full model (13) and reduced model (14) based on 1000 simulation runs. LR denotes the maximum likelihood estimates of (13) fitted to the internal data, EB denotes our empirical Bayes estimator defined in (4) and CML denotes the constrained maximum likelihood estimator proposed in Chatterjee et al. (2016).

| Setting | Method | BIAS            |                 |                 |                 | SD              |                 |                 |                 | MSE             |                 |                 |                 |
|---------|--------|-----------------|-----------------|-----------------|-----------------|-----------------|-----------------|-----------------|-----------------|-----------------|-----------------|-----------------|-----------------|
|         |        | $\hat{\beta}_0$ | $\hat{\beta}_1$ | $\hat{\beta}_2$ | $\hat{\beta}_3$ | $\hat{\beta}_0$ | $\hat{\beta}_1$ | $\hat{\beta}_2$ | $\hat{\beta}_3$ | $\hat{\beta}_0$ | $\hat{\beta}_1$ | $\hat{\beta}_2$ | $\hat{\beta}_3$ |
| I       | LR     | -.003           | -.003           | .005            | .003            | .083            | .081            | .078            | .070            | .007            | .007            | .006            | .005            |
|         | EB     | .002            | -.003           | .005            | .003            | .067            | .066            | .078            | .070            | .005            | .004            | .006            | .005            |
|         | CML    | .014            | -.005           | .005            | .004            | .037            | .039            | .078            | .070            | .002            | .002            | .006            | .005            |
| II      | LR     | -.004           | -.004           | .003            | -.002           | .080            | .081            | .081            | .071            | .006            | .007            | .007            | .005            |
|         | EB     | .015            | .005            | .002            | -.004           | .081            | .077            | .081            | .071            | .007            | .006            | .007            | .005            |
|         | CML    | .229            | .102            | .004            | .002            | .039            | .042            | .081            | .071            | .054            | .012            | .007            | .005            |
| III     | LR     | -.005           | -.005           | .003            | .001            | .105            | .115            | .081            | .043            | .011            | .013            | .006            | .002            |
|         | EB     | -.008           | .011            | .001            | -.008           | .105            | .117            | .081            | .044            | .011            | .014            | .006            | .002            |
|         | CML    | -.068           | .216            | .004            | .009            | .078            | .094            | .081            | .043            | .011            | .056            | .007            | .002            |
| IV      | LR     | -.004           | -.002           | .001            | .001            | .103            | .111            | .083            | .049            | .011            | .012            | .007            | .002            |
|         | EB     | .011            | .015            | -.001           | -.012           | .102            | .108            | .083            | .064            | .011            | .012            | .007            | .004            |
|         | CML    | .120            | .211            | .005            | .011            | .070            | .069            | .083            | .061            | .019            | .049            | .007            | .004            |

Table 3: Characteristics of study participants in the external, internal and validation data sets of our data application in Section 4 of the main text.

|                                      | Thompson (External) |      | Training (Internal) |      | Validation |      |
|--------------------------------------|---------------------|------|---------------------|------|------------|------|
|                                      | N (5519)            | (%)  | N (711)             | (%)  | N (1225)   | (%)  |
| Age                                  |                     |      |                     |      |            |      |
| < 55                                 | 0                   | 0.0  | 119                 | 16.7 | 195        | 15.9 |
| [55,60)                              | 38                  | 0.7  | 137                 | 19.3 | 195        | 15.9 |
| [60, 64)                             | 1143                | 20.7 | 132                 | 18.6 | 188        | 15.3 |
| [65, 69)                             | 1741                | 31.5 | 117                 | 16.5 | 237        | 19.3 |
| $\geq 70$                            | 2597                | 47.1 | 142                 | 20   | 333        | 27.2 |
| NA                                   |                     |      | 1                   | 0.1  |            |      |
| Family History of PCa                |                     |      |                     |      |            |      |
| No                                   | 4599                | 83.3 | 546                 | 76.8 | 940        | 76.7 |
| Yes                                  | 920                 | 16.7 | 162                 | 22.8 | 230        | 18.8 |
| NA                                   | –                   | –    | 3                   | 0.4  | 55         | 4.5  |
| Race                                 |                     |      |                     |      |            |      |
| White                                | 5276                | 95.6 | 568                 | 79.9 | 512        | 41.8 |
| African American                     | 175                 | 3.2  | 73                  | 10.3 | 82         | 6.7  |
| Other/Unknown                        | 68                  | 1.2  | 70                  | 9.8  | 631        | 51.5 |
| Number of previous negative biopsies |                     |      |                     |      |            |      |
| 0                                    | 4873                | 88.3 | 196                 | 27.6 | 246        | 20.1 |
| $\geq 1$                             | 753                 | 13.6 | 515                 | 72.4 | 977        | 79.8 |
| NA                                   | –                   | –    | –                   | –    | 2          | 0.2  |
| PSA Level (ng/mL)                    |                     |      |                     |      |            |      |
| 0 - 1                                | 1963                | 35.6 | 17                  | 2.4  | 54         | 4.4  |
| 1.1 - 2                              | 1640                | 29.7 | 30                  | 4.2  | 97         | 7.9  |
| 2.1 - 3                              | 775                 | 14.0 | 53                  | 7.5  | 126        | 10.3 |
| 3.1 - 4                              | 510                 | 9.2  | 96                  | 13.5 | 170        | 13.9 |
| 4.1 - 6                              | 481                 | 8.7  | 274                 | 38.5 | 419        | 34.2 |
| $> 6$                                | 150                 | 2.7  | 241                 | 33.9 | 359        | 29.3 |
| HG PCa                               | 257                 | 4.7  | 192                 | 27.0 | 224        | 18.3 |

Table 4: Parameter estimates of model (17) fitted to our data application using our empirical Bayes (EB) estimator defined in (4) of the main text and the constrained maximum likelihood (CML) defined in Chatterjee et al. (2016).  $LR^F$  and  $LR^R$  denotes the parameter estimates of the full (17) and reduced models (16) defined in the main text respectively fitted to the internal data set or the validation data set of our data application.

| Parameter | Prediction Model |        | Internal Data |        | Validation Data |        | External Data |
|-----------|------------------|--------|---------------|--------|-----------------|--------|---------------|
|           | EB               | CML    | $LR^F$        | $LR^R$ | $LR^F$          | $LR^R$ | PCPTrc        |
| Intercept | -6.076           | -7.505 | -6.097        | -4.740 | -7.269          | -6.542 | -6.246        |
| lpsa      | 0.860            | 1.188  | 0.867         | 0.958  | 0.924           | 0.934  | 1.293         |
| age       | 0.010            | 0.007  | 0.010         | 0.034  | 0.032           | 0.054  | 0.031         |
| dre       | 0.975            | 0.756  | 0.984         | 1.139  | 0.607           | 0.623  | 1.001         |
| priobiop  | -1.024           | -0.220 | -1.051        | -1.154 | -0.942          | -1.054 | -0.363        |
| aa        | 0.184            | 0.699  | 0.197         | 0.460  | 0.050           | 0.116  | 0.960         |
| lt2erg    | 0.528            | 0.518  | 0.524         | –      | 0.318           | –      | –             |
| lpca3     | 0.129            | 0.127  | 0.128         | –      | 0.163           | –      | –             |

Table 5: Simulation results. Proportion of 1,000 simulation runs for which absolute estimation error in estimation for method  $A$  (CML or EB) was less than absolute estimation error in estimation for method  $B$  (LR or CML) when a covariate vector is randomly drawn from the external covariate distribution (Ext) or internal covariate distribution (Int) in each regression settings I, II, III and IV defined in Table 1 of the main text.

| Setting      | Standard Linear Regression |     |     |     |     |     |     | Standard Logistic Regression |     |     |     |     |     |     |
|--------------|----------------------------|-----|-----|-----|-----|-----|-----|------------------------------|-----|-----|-----|-----|-----|-----|
|              | I                          |     | II  |     | III |     | IV  | I                            |     | II  |     | III |     | IV  |
| Distribution | Ext                        | Ext | Int | Ext | Int | Ext | Int | Ext                          | Ext | Int | Ext | Int | Ext | Int |
| CML/LR       | .65                        | .08 | .08 | .64 | .65 | .22 | .24 | .69                          | .10 | .09 | .72 | .72 | .26 | .31 |
| EB/LR        | .71                        | .42 | .45 | .70 | .70 | .47 | .48 | .75                          | .48 | .48 | .79 | .77 | .54 | .57 |
| EB/CML       | .42                        | .93 | .93 | .41 | .41 | .79 | .79 | .40                          | .91 | .92 | .34 | .36 | .76 | .72 |

| Setting      | Standard Linear Regression |     |     |     |     |     |     | Standard Logistic Regression |     |     |     |     |     |     |
|--------------|----------------------------|-----|-----|-----|-----|-----|-----|------------------------------|-----|-----|-----|-----|-----|-----|
|              | I                          |     | II  |     | III |     | IV  | I                            |     | II  |     | III |     | IV  |
| Distribution | Ext                        | Ext | Int | Ext | Int | Ext | Int | Ext                          | Ext | Int | Ext | Int | Ext | Int |
| CML/LR       | .64                        | .15 | .14 | .46 | .42 | .31 | .32 | .69                          | .16 | .15 | .30 | .34 | .32 | .30 |
| EB/LR        | .68                        | .47 | .48 | .57 | .52 | .45 | .44 | .76                          | .52 | .50 | .50 | .50 | .49 | .52 |
| EB/CML       | .42                        | .87 | .88 | .58 | .62 | .71 | .68 | .36                          | .85 | .86 | .70 | .68 | .70 | .72 |

Table 6: Monte Carlo (MC) and Bootstrap (BS) standard deviation (SD) estimates in the linear and logistic regression setting I with full model (12) and reduced model (14) averaged over 1000 simulation runs. In each Monte Carlo run, 500 bootstrap samples were used.

| Method   | Statistic           | Bootstrap SD |       |       |       | MC    |
|----------|---------------------|--------------|-------|-------|-------|-------|
|          |                     | Q1           | Q2    | Q3    | Mean  | SD    |
| Linear   | $\widehat{\beta}_0$ | 0.155        | 0.163 | 0.174 | 0.165 | 0.153 |
|          | $\widehat{\beta}_1$ | 0.166        | 0.174 | 0.184 | 0.176 | 0.169 |
|          | $\widehat{\beta}_2$ | 0.191        | 0.198 | 0.206 | 0.199 | 0.199 |
| Logistic | $\widehat{\beta}_0$ | 0.060        | 0.064 | 0.068 | 0.065 | 0.060 |
|          | $\widehat{\beta}_1$ | 0.066        | 0.070 | 0.075 | 0.070 | 0.065 |
|          | $\widehat{\beta}_2$ | 0.078        | 0.080 | 0.083 | 0.080 | 0.079 |

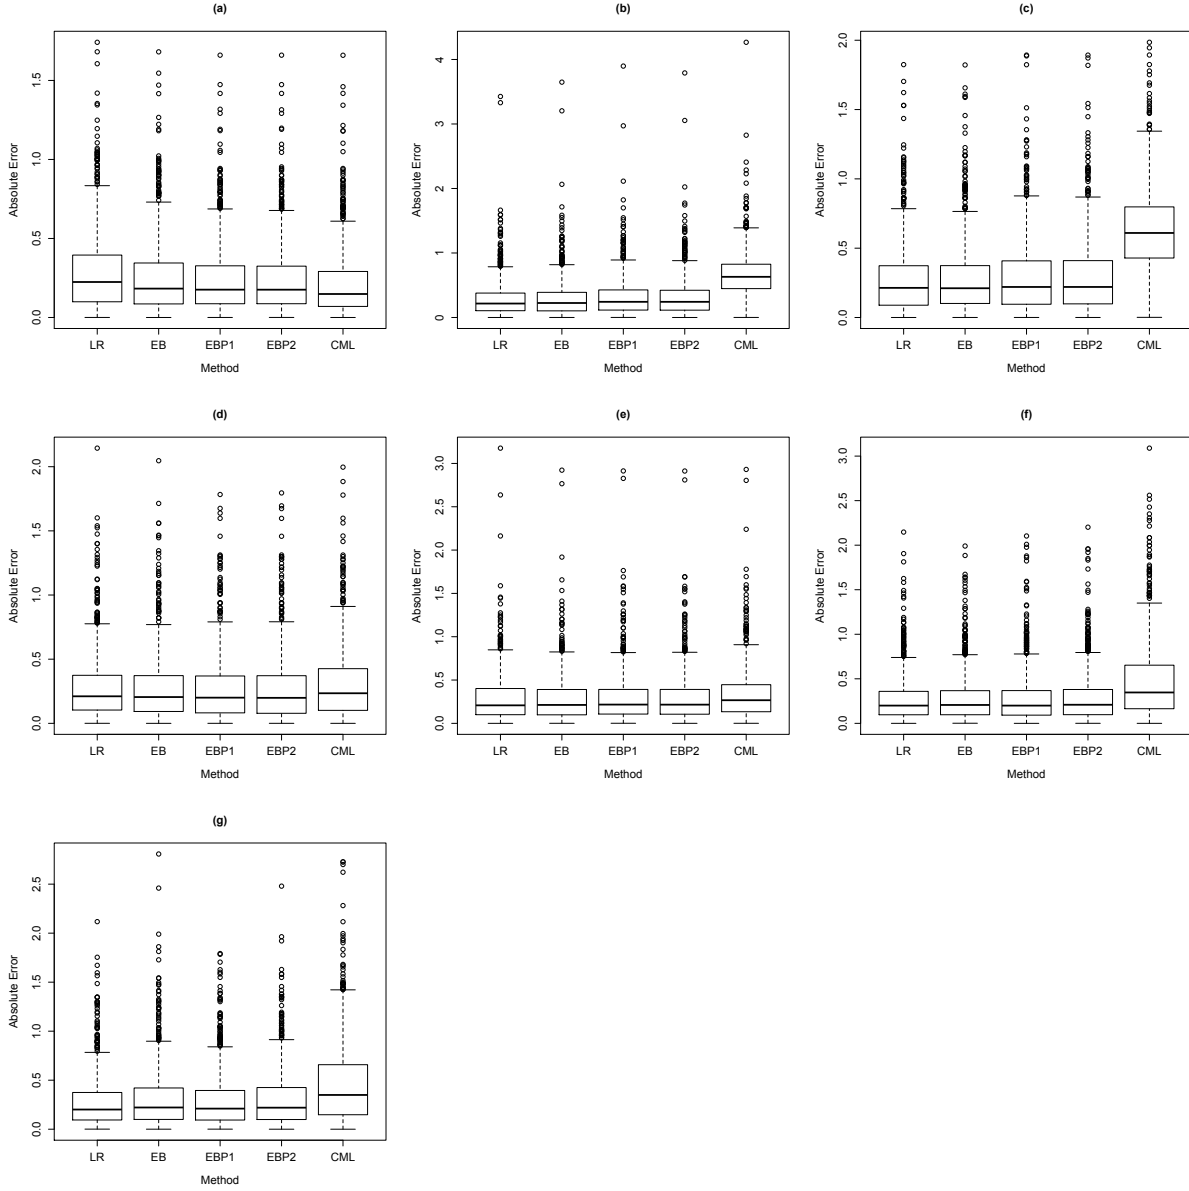

Figure 1: Box plots of absolute estimation error defined by (a),(b),(d),(f)  $|\widehat{M}_{E,r} - W_{E,r}^T \beta|$  and (a),(c),(e),(g)  $|\widehat{M}_{I,r} - W_{I,r}^T \beta|$  based on  $r = 1, \dots, 1000$  simulation runs in the standard linear regression settings I (a), II (b and c), III (d and e), IV (f and g) specified in Table 1 of the main text with full model (13) and reduced model (14)  $W_{E,r}^T$  is a covariate vector drawn from the external population,  $W_{I,r}^T$  is drawn from the internal population,  $\widehat{M}_{E,r}$  and  $\widehat{M}_{I,r}$  are estimates of the conditional mean of  $Y$  given  $(X, Z)$  in the external and internal populations respectively resulting from maximum likelihood (LR), our empirical Bayes estimators EB, EBP1, and EBP2 or the constrained maximum likelihood estimator CML.

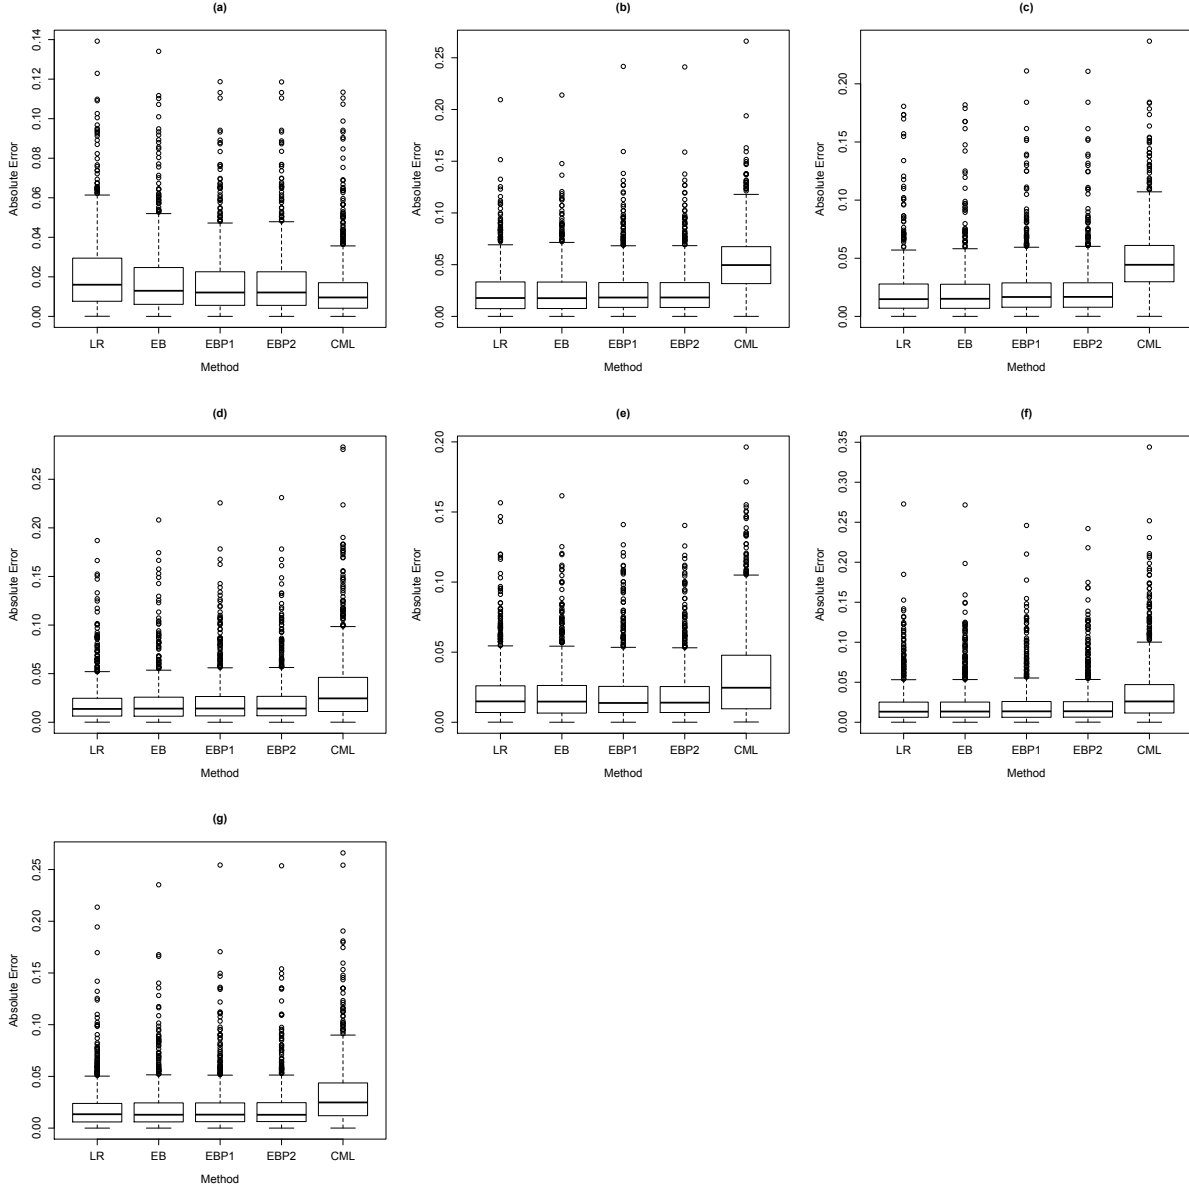

Figure 2: Box plots of absolute estimation error defined by (a),(b),(d),(f)  $|\widehat{M}_{E,r} - g^{-1}(W_{E,r}^T \beta)|$  and (a),(c),(e),(g)  $|\widehat{M}_{I,r} - g^{-1}(W_{I,r}^T \beta)|$  based on  $r = 1, \dots, 1000$  simulation runs in the standard logistic regression settings I (a), II (b and c), III (d and e), IV (f and g) specified in Table 1 of the main text with full model (13) and reduced model (14)  $W_{E,r}^T$  is a covariate vector drawn from the external population,  $W_{I,r}^T$  is drawn from the internal population,  $\widehat{M}_{E,r}$  and  $\widehat{M}_{I,r}$  are estimates of the conditional mean of  $Y$  given  $(X, Z)$  in the external and internal populations respectively resulting from maximum likelihood (LR), our empirical Bayes estimators EB, EBP1, and EBP2 or the constrained maximum likelihood estimator CML.



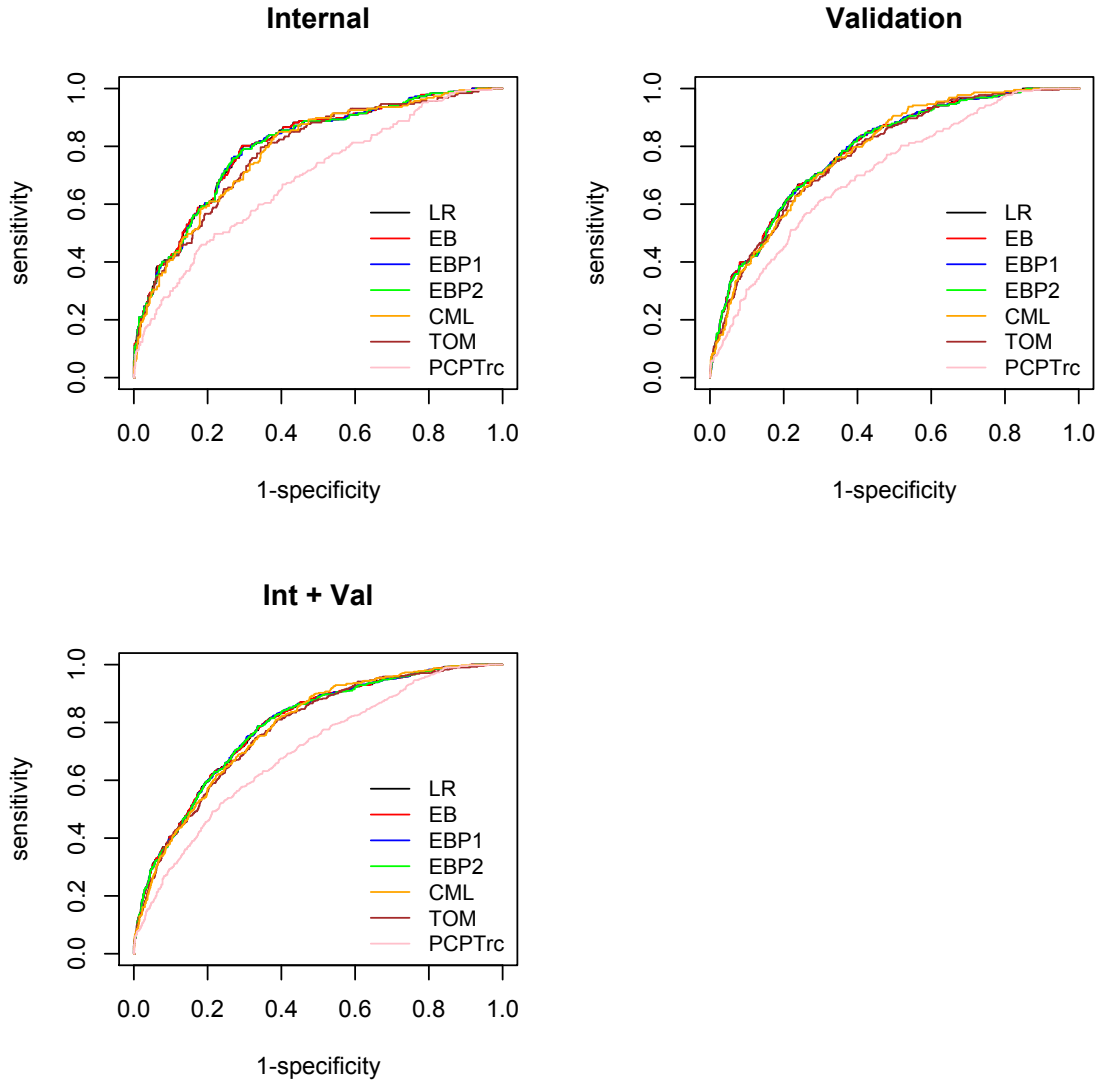

Figure 3: Receiver-operator curves resulting from maximum likelihood, our empirical Bayes estimators EB, EBP1 and EBP1 defined in Section 2.3, the constrained maximum likelihood estimator CML proposed in Chatterjee et al. (2016), the model (TOM) proposed in Tomlins et al. (2016), or the PCPTrc 1.0 calculator applied to the internal, validation and combined data sets of our data application.

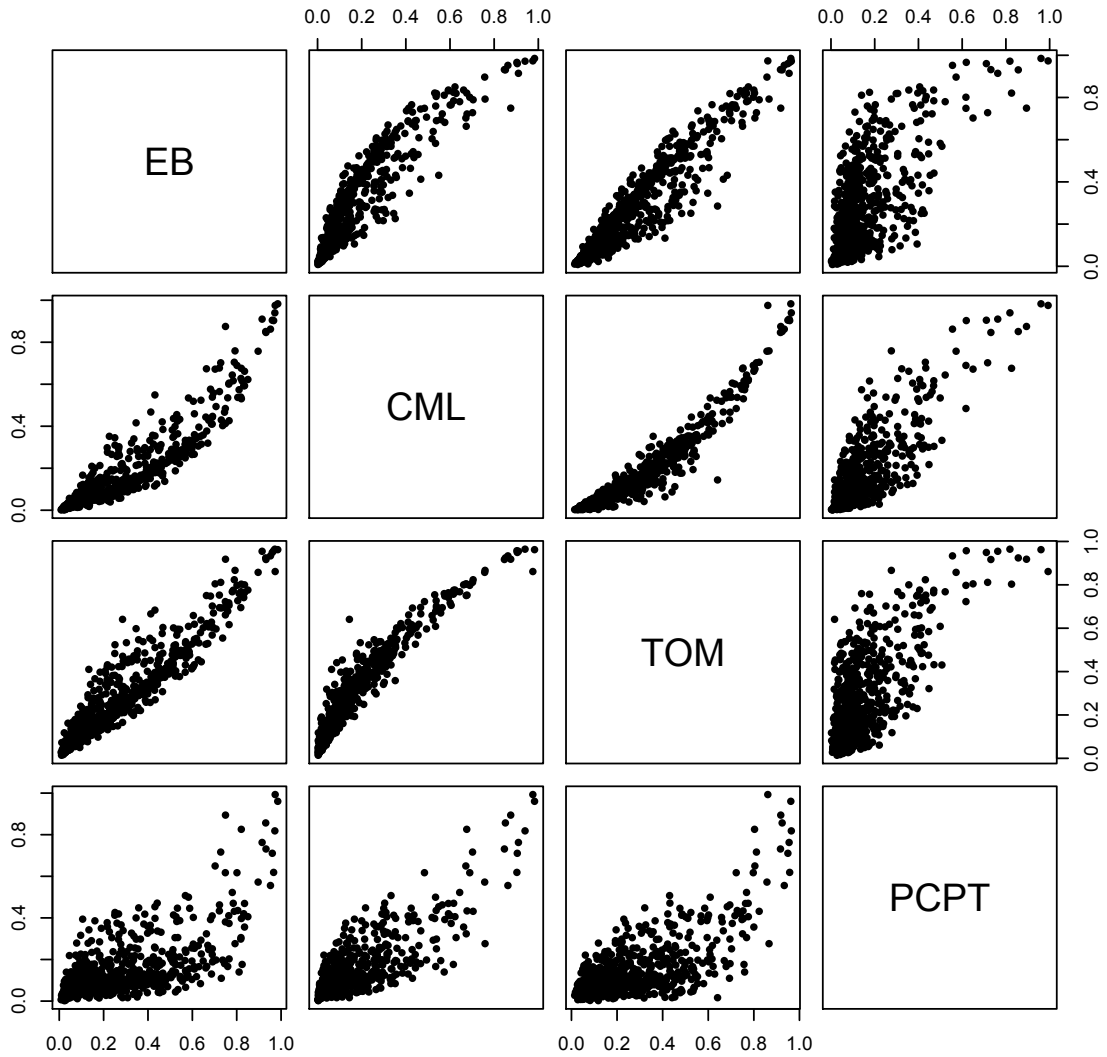

Figure 4: Scatterplot matrix of predicted outcomes resulting from our empirical Bayes estimator EB defined in equation (4), the constrained maximum likelihood estimator CML proposed in Chatterjee et al. (2016), the model (TOM) proposed in Tomlins et al. (2016), or the PCPTrc 1.0 calculator applied to the internal data application.

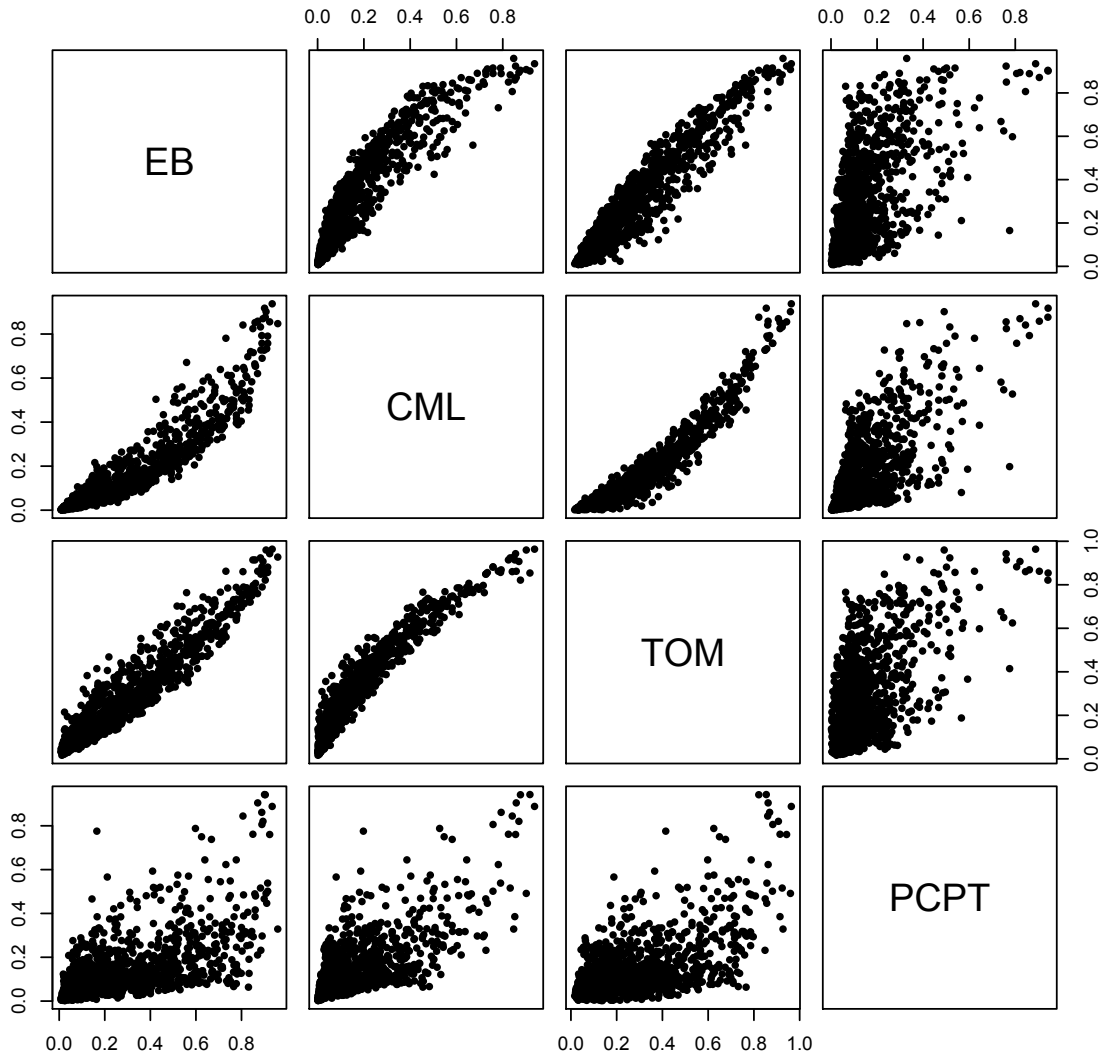

Figure 5: Scatterplot matrix of predicted outcomes resulting from our empirical Bayes estimator EB defined in equation (4), the constrained maximum likelihood estimator CML proposed in Chatterjee et al. (2016), the model (TOM) proposed in Tomlins et al. (2016), or the PCPTrc 1.0 calculator applied to the validation data application.
